# Supplementary material for: Application of the Fluorescence-Activating and Absorption-Shifting Tag (FAST) for Flow Cytometry in Methanogenic Archaea
Source: PubMed Central journal article supplement (PMC10132111; doi:10.1128/aem.01786-22), 2023-03-15
Supplement: aem.01786-22-s0001.pdf [file aem.01786-22-s0001.pdf]

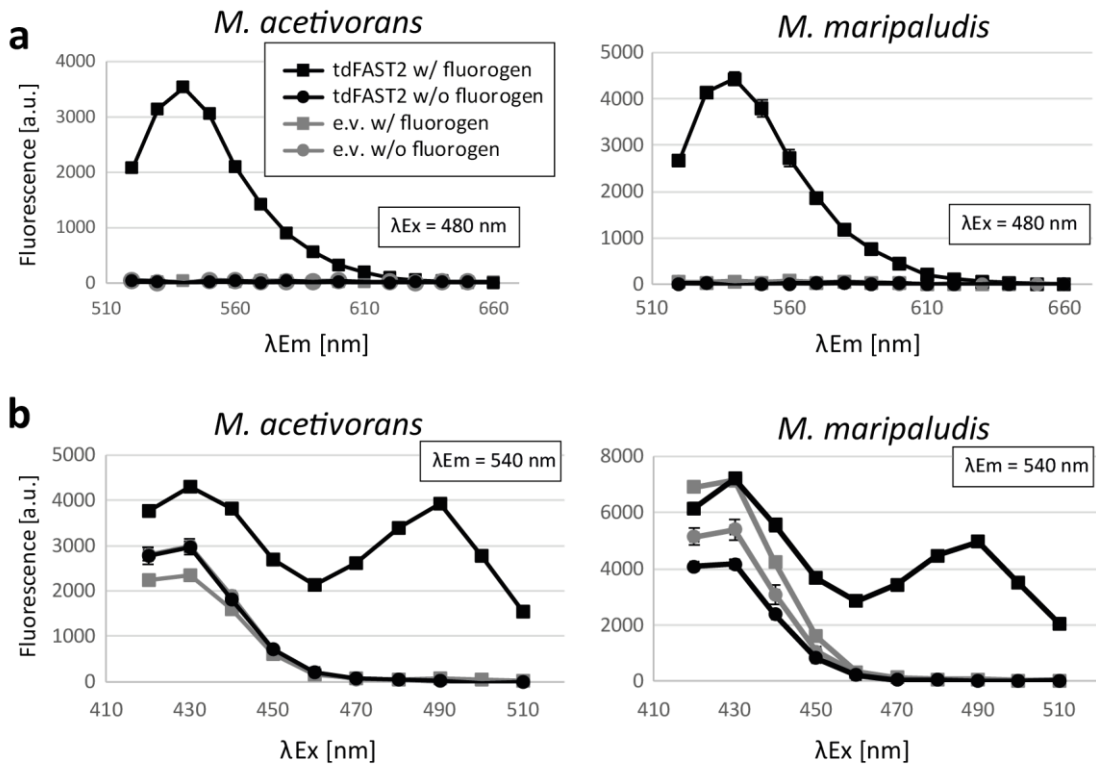

**Supplementary Figure 1. tdFAST2-expressing methanogens show a specific fluorescent when the fluorogen HMBR is present.**

Fluorescence of *M. acetivorans* and *M. maripaludis* cells is shown. **a)** Fluorescence spectrum upon excitation at 480 nm. **b)** Fluorescence at 540 nm when different excitation wavelengths are applied. Cells expressing tdFAST2 (tdFAST2) or control cells carrying an empty vector construct (e.v.) were analysed in presence (w/ fluorogen) or absence (w/o fluorogen) of HMBR. Used cells were in the stationary growth phase. Mean values and standard deviation of duplicates are shown.

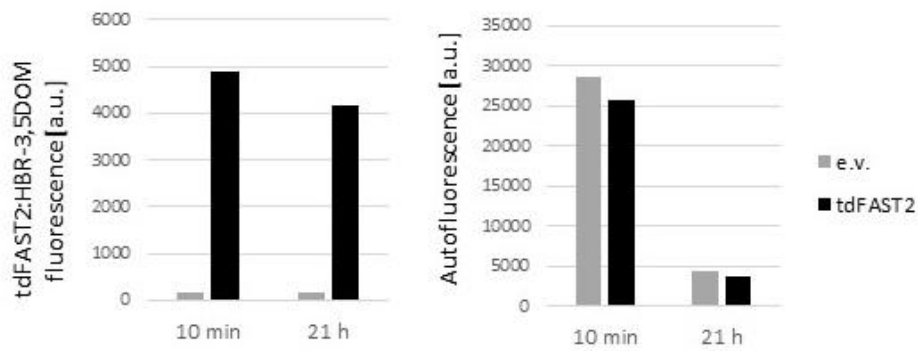

**Supplementary Figure 2. tdFAST2:fluorogen fluorescence can be detected in methanogens after 21 h exposure to oxygen.**

*M. acetivorans* cells expressing tdFAST2 or harbouring an empty vector construct (e.v.) were analyzed in the presence of 5  $\mu$ M HBR-3,5DOM using a microplate reader. tdFAST2:HBR-3,5DOM fluorescence ( $\lambda$ Ex = 515 nm /  $\lambda$ Em = 590 nm) and autofluorescence ( $\lambda$ Ex = 420 nm /  $\lambda$ Em = 480 nm) was measured after storing the plate under aerobic conditions in the dark for 10 min and 21h.

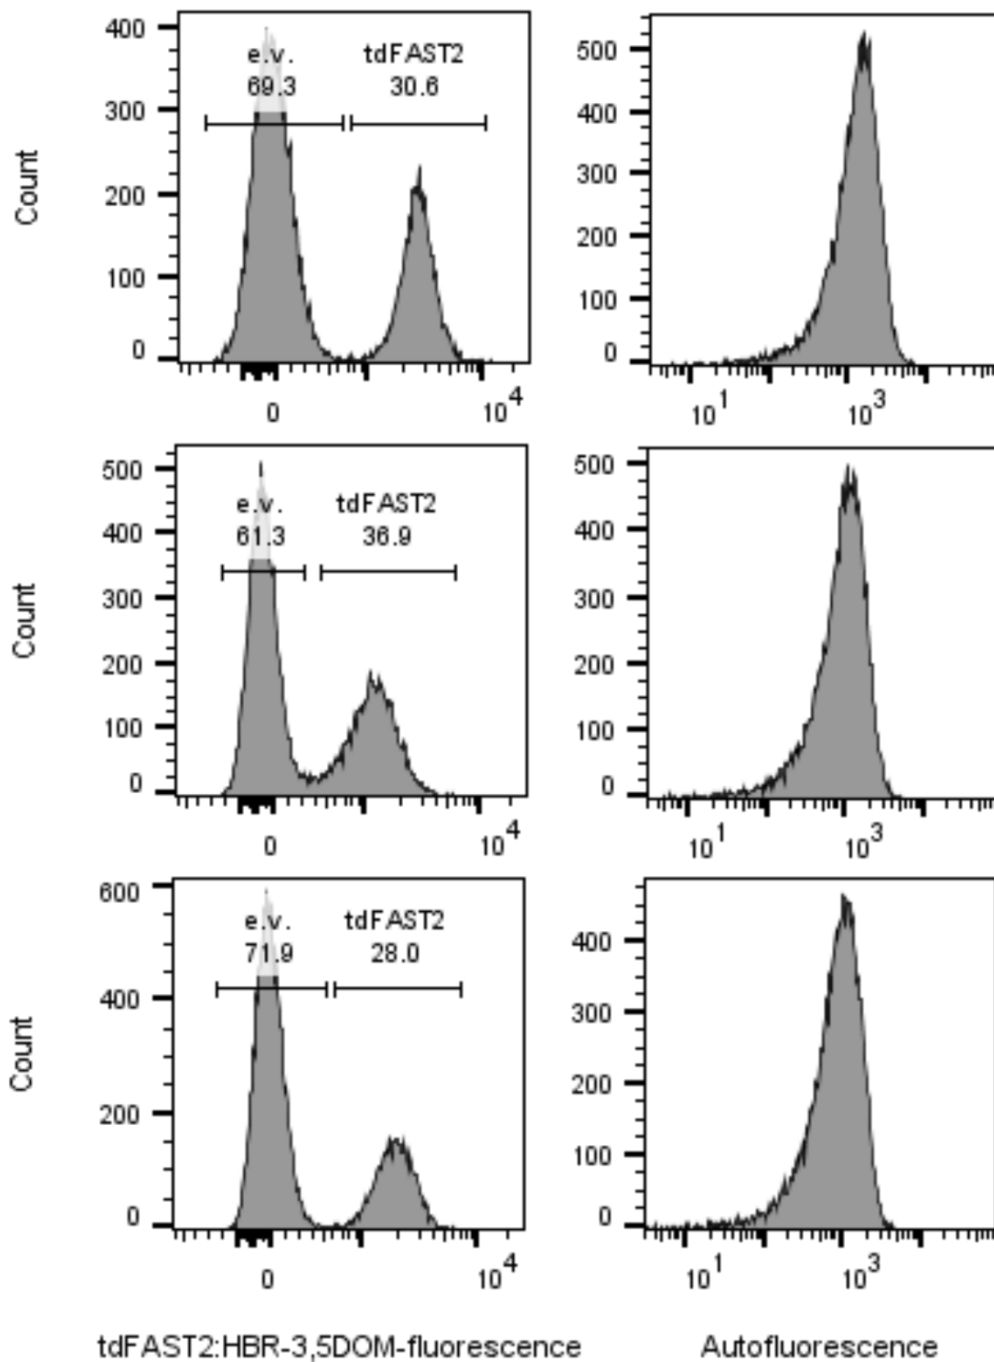

**Supplementary Figure 3. Flow cytometry provides reproducible results.**

*M. acetivorans* cultures expressing tdFAST2 or harbouring an empty vector (e.v.) construct were mixed three times (top row, middle row, bottom row) from different cultures on different days in a ratio of 1:2 and analyzed with flow cytometry in the presence of 5 mM HBR-3,5DOM. Histograms show the HBR-3,5DOM-fluorescence and autofluorescence.

Supplementary File 1  
Synthesized sequences

Synthesized fragment encoding codon-optimized tdFAST2 for expression in *M. acetivorans*

CATATGGAACACGTCGCGTTTGGCTCGGAAGATATTGAGAACACGTTAGCTAAAAATGGAT  
GATGGTCAACTAGACGGCTTAGCCTTCGGTGCAATACAGCTGGACGGAGATGGCAATATC  
TTGCAGTATAATGCCGCGGAGGGCGACATAACCGGACGAGATCCTAACAGGTCATTGGA  
AAGAACTTCTTCAAGGATGTAGCCCCAGGCACCGATTCCCCTGAATTTTACGGAAAGTTC  
AAAGAAGGAGTTGCAAGTGGGAACCTGAATACGATGTTTGAATGGATGATTCCGACCTCA  
AGAGGTCTTACCAAAGTTAAGATACACATGAAAAAGGCCCTTCCGGAGATTCTTATTGG  
GTATTTCGTTAAGAGGGTTGGAGGAGGGAGCGGGGTGGGGAACATGTTGCTTTTGGGAAGC  
GAAGATATCGAAAACACCCCTTGCAAAAATGGATGATGGACAACCTCGATGGTCTGGCTTTT  
GGCGCTATCCAGCTGGATGGGGACGGGAATATACTCCAGTACAATGCTGCAGAAGGAGAC  
ATTACAGGAAGGGACCCAAAGCAGGTAATCGGCAAAAACCTTCTTCAAAGACGTTGCACCA  
GGAACGGACTCGCCAGAATTCTATGGGAAGTTTAAAGAAGGGGTCGCTTCCGGTAACCTT  
AACACTATGTTTGAGTGGATGATTCCCACGTCTAGAGGTCCCCTAAAGTGAAAAATACAC  
ATGAAAAAAGCACTTAGTGGAGACAGTTACTGGGTGTTTGTA AAAACGGGTGTAA **GGATCC**

underlined = tdFAST2 protein-encoding sequence

**CATATG** = *NdeI* restriction site

**GGATCC** = *BamHI* site

Synthesized fragment encoding codon-optimized tdFAST2 for expression in *M. maripaludis*

ACTAGTAGTGGGAGGTGCGCTATGGAACATGTGGCCTTCGGATCAGAAGATATAGAGAAC  
ACTTTAGCCAAGATGGATGATGGGCAATTAGACGGATTAGCGTTTGGGGCAATTCAGCTA  
GATGGGGATGGTAACATTCTTCAATACAATGCTGCTGAAGGGGATATAACCGGGCGAGAT  
CCAAAACAGGTAATTGGAAAGAATTTTCAAAGACGTCGCACCGGGTACAGATTCACCT  
GAATTTTATGGTAAATTTAAAGAAGGTGTTGCAAGTGGAAATCTCAATACGATGTTCGAA  
TGGATGATACCTACATCTAGAGGACCTACGAAAGTAAAAATCCACATGAAAAAAGCTCTA  
TCAGGTGACAGCTATTGGGTATTTGTTAAAAGAGTAGGAGGCGGGTCAGGAGGAGGAGAA  
CACGTCGCTTTCGGTAGTGAAGATATAGAAAACACATTAGCAAAGATGGACGACGGACAG  
CTTGATGGGCTTGCATTTGGAGCAATCCAATTAGATGGAGATGGTAATATACTTCAATAC  
AATGCAGCAGAAGGTGACATCACTGGTAGAGATCCCAAACAGGTCATTGGAAAAAATTTT  
TTTAAAGATGTTGCACCAGGAACAGATTCCCCAGAATTTTACGGAAAATTTAAAGAAGGA  
GTAGCATCTGGAATTTGAATACAATGTTTGAATGGATGATTCCAACCTTCTAGAGGACCA  
ACTAAAGTTAAGATTCACATGAAAAAAGCACTGTCCGGGAGATTCATATTGGGTTTTTTGTT  
AAAAGGGTTTAA**AAATTCCTTCTTTTAAACGTTCTCCAGTCTGCAG**

underlined = tdFAST2 protein-encoding sequence

**bold** = terminator sequence

**ACTAGT** = *SpeI* restriction site

**CTGCAG** = *PstI* site

Supplementary File 2

**Plasmid sequences**

**pNB730::tdFAST2**

TCTAGTTGTCTGCTCCCGGCATCCGCTTACAGACAAGCTGTGACCGTCTCCGGGAGCTGCATGTGTCAGAG  
GTTTTACCGTCATCACCGAAACGCGCGAGACGAAAGGGCCTCGTGATACGCCTATTTTTATAGGTTAATGT  
CATGATAATAATGGTTTCTTAGACGTCAGGTGGCACTTTTCGGGGAAATGTGCGCGGAACCCCTATTTGTTT  
ATTTTTCTAAATACATTCAAATATGTATCCGCTCATGAGACAATAACCCTGATAAATGCTTCAATAATATTGA  
AAAAGGAAGAGTATGAGTATTCAACATTTCCGTGTGCCCTTATCCCTTTTTTTCGGGCATTTTGCCTTCCTG  
TTTTTGCTCACCCAGAAACGCTGGTGAAAGTAAAAGATGCTGAAGATCAGTTGGGTGCACGAGTGGGTTAC  
ATCGAACTGGATCTCAACAGCGGTAAGATCCTTGAGAGTTTTCGCCCCGAAGAACGTTTTCCAATGATGAGC  
ACTTTTAAAGTTCTGCTATGTGGCGCGGTATTATCCCGTATTGACGCCGGGCAAGAGCAACTCGGTCGCCGC  
ATACACTATTCTCAGAATGACTTGGTTGAGTACTACCGAGTCACAGAAAAGCATCTTACGGATGGCATGACA  
GTAAGAGAATTATGCAGTGTGCCATAACCATGAGTGATAAACAATGCGGCCAACTTACTTCTGACAACGATC  
GGAGGACCGAAGGAGCTAACCGCTTTTTTGCACAACATGGGGGATCATGTAACCTGCCTTGATCGTTGGGA  
ACCGGAGCTGAATGAAGCCATACCAAACGACGAGCGTGACACCACGATGCCTGTAGCAATGGCAACAACG  
TTGCGCAAACATTAAGTGGCGAACTACTTACTTAGCTTCCCGGCAACAATTAAGACTGGATGGAGGCG  
GATAAAGTTGCAGGACCACTTCTGCGCTCGGCCCTTCCGGCTGGCTGGTTTATTGCTGATAAATCTGGAGCC  
GGTGAGCGTGGGTCTCGCGGTATCATTGCAGCACTGGGGCCAGATGGTAAGCCCTCCCGTATCGTAGTTAT  
CTACACGACGGGAGTCAGGCAACTATGGATGAACGAAATAGACAGATCGCTGAGATAGGTGCCTCACTG  
ATTAAGCATTGGTAACTGTCAGACCAAGTTTACTCATATATACTTTAGATTGATTTAAAACCTCATTTTTAATT  
TAAAAGGATCTAGGTGAAGATCCTTTTTGATAATCTCATGACCAAAATCCCTTAACGTGAGTTTTCGTTCCAC  
TGAGCGTCAGACCCCGTAGAAAAGATCAAAGGATCTTCTTGAGATCCTTTTTTCTGCGCGTAATCTGCTGC  
TTGCAAACAAAAAACCACCGCTACCAGCGGTGGTTTGTGGCCGATCAAGAGCTACCAACTCTTTTTCCG  
AAGGTAACCTGGCTTCAGCAGAGCGCAGATACCAAATACTGTTCTTCTAGTGTAGCCGTAGTTAGGCCACCA  
CTTCAAGAACTCTGTAGCACCGCCTACATACCTCGCTCTGCTAATCCTGTTACCAGTGGCTGCTGCCAGTGGC  
GATAAGTCGTGCTTACCGGGTTGGACTCAAGACGATAGTTACCGGATAAGGCGCAGCGGTCCGGGCTGAA  
CGGGGGGTTTCGTGCACACAGCCCAGCTTGGAGCGAACGACCTACACCGAACTGAGATACCTACAGCGTGA  
GCTATGAGAAAGCGCCACGCTTCCCGAAGGGAGAAAGGCGGACAGGTATCCGGTAAGCGGCAGGGTCGG  
AACAGGAGAGCGCACGAGGGAGCTTCCAGGGGAAACGCCTGGTATCTTTATAGTCCTGTGCGGTTTTCGC  
CACCTCTGACTTGAGCGTCGATTTTTGTGATGCTCGTCAGGGGGCGGAGCCTATGGAAAACGCCAGCAA  
CGCGGCCTTTTTACGGTTCCTGGCCTTTTGTGCTGACATGTTCTTTCTGCGTATCCCCTGATT  
CTGTGGATAACCGTATTACCGCCTTTGAGTGAGCTGATACCGCTCGCCGACCCGAACGACCGAGCGCAGC  
GAGTCAGTGAGCGAGGAAGCGGAAGAGCGCCCAATACGCAAACCGCCTCTCCCGCGCGTGGCCGATT  
ATTAATGCAGCTGGCACGACAGTTTTCCGACTGGAAAGCGGGCAGTGAGCGCAACGCAATTAATGTGAG  
TTAGCTCACTCATTAGGCACCCAGGCTTACACTTTATGCTTCCGGCTCGTATGTTGTGTGGAATTGTGAGC  
GGATAACAATTTACACAGGAAACAGCTATGACCATGATTACGCCAAGCTTGCATGCTCATGCTCCAGTTTT  
CCTGTCCTTCGGGCACCTCGACGTCGGCGGTGACGGTGAAGCCGAGCCGCTCGTAGAAGGGGAGGTTGCG  
GGGCGCGGAGGTCTCCAGGAAGGCGGGCACCCCGCGCGCTCGGCCGCTCCACTCCGGGGAGCACGAC  
GGCGCTGCCAGACCCTTGCCCTGGTGGTCCGGGCGAGACGCCGACGGTGGCCAGGAACCACGCGGGCTCC  
TTGGGCCGGTGCAGGCGCCAGGAGGCTTCCATCTGTTGCTGCGCGGCCAGCCGGGAACCGCTCAACTCGG  
CCATGCGCGGGCCGATCTCGGCGAACACCGCCCCGCTTCGACGCTCTCCGGCGTGGTCCAGACCGCCACC  
GCGGCGCCGTCGTCCGCGACCCACACCTTGCCGATGTCGAGCCGACGCGCGTGAGGAAGAGTTCTTGCA  
GCTCGGTGACCCGCTCGATGTGGCGGTCCGGGTCGACGGTGTGGCGCGTGGCGGGGTAGTCGGCGAACG  
CGGCGGCGAGGGTGCGTACGGCCCGGGGACGTCGTCGCGGGTGGCGAGGGCGCACCGTGGGTTTTATATT  
CGGTCATGAGAATCACTCTAGTTTCTATTTTTTGTATATACATCATAACATACTCTATGTATATATATTCA  
CTTTTTCATTAACATTAATAGAAAAGTTTATATATAAGATGTTAATAACACAATAATTTGAATTTGAATACT

CAAAAAATGGGCTTTAATATATAAAAATTAAGATGAAAATAGATGATTTTTTAAAAAATGTTATTATTATATC  
TCAATATCTAAATATTAGATTAATATTAATTATTACCCAAATATTTCAATGAATATTTAGTTTTGAATAGTATA  
TTACGAATAGGGCGTTTTTTATTACCTACTACTATTTTCCGAAGATTTTTTAAGACTCTCTTAAAATTAATCAT  
CCTCTAGAGGCGCGCCAATACGCAAACCGACTAGACTTAATTAAGATCCGGCGCGCCCCGGGTACCGAGC  
TCGAATTCCTGGCCGTCGTTTTACAACGTCGTGACTGGGAAAACCTGGCGTTACCCAACTTAATCGCCTT  
GCAGCACATCCCCCTTCGCCAGCTGGCGTAATAGCGAAGAGGCCCGCACCGATCGCCCTTCCCAACAGTT  
GCGCAGCCTGAATGGCGAATGGCGCCTGATGCGGATTTTTCTCCTTACGCATCTGTGCGGTATTTACACCT  
CATTTATCGGAGAACACAAAAGATTTAAGTACCTTCTAAACGAATGAGATTTTCATTGGGAATAGTGGACACT  
CGAGTAGGTGACCAGTCCCAAATGATTTTAATAAATTAAGGAGGAAATTCATATGGAACACGTGCGGTTT  
GGCTCGGAAGATATTGAGAACACGTTAGCTAAAATGGATGATGGTCAACTAGACGGCTTAGCCTTCGGTGC  
AATACAGCTGGACGGAGATGGCAATATCTTGCAAGTATAATGCCGCGGAGGGGCGACATAACCGGACGAGAT  
CCTAAACAGGTCATTGAAAGAAGTCTTCAAGGATGTAGCCCCAGGCACCGATTCCCCTGAATTTTACGGA  
AAGTTCAAAGAAGGAGTTGCAAGTGGGAACCTGAATACGATGTTTGAATGGATGATTCCGACCTCAAGAG  
GTCCTACCAAAGTTAAGATACACATGAAAAAGGCCCTTTCCGGAGATTCTTATTGGGTATTCGTTAAGAGGG  
TTGGAGGAGGGAGCGGGGGTGGGGAACATGTTGCTTTTGAAGCGAAGATATCGAAAACACCCTTGCAA  
AATGGATGATGGACAACCTCGATGGTCTGGCTTTTGGCGCTATCCAGCTGGATGGGGACGGGAATATACTCC  
AGTACAATGCTGCAGAAGGAGACATTACAGGAAGGGACCCAAAGCAGGTAATCGGCAAAAACCTTCTCAA  
AGACGTTGCACCAGGAACGGACTCGCCAGAATTCTATGGGAAGTTTAAAGAAGGGGTGCTTCCGGTAAC  
CTAACACTATGTTTGAAGTGGATGATTCCCACGTCTAGAGGTCCCACTAAAGTAAAATACACATGAAAAA  
GCACTTAGTGGAGACAGTTACTGGGTGTTTGTAAAACGGGTGTAAGGATCCAAGCTTGGGCCCTCGCGACT  
CGAGACACCACCATCATCATCACCACCATTGGTCCCATCCCAATTTGAAAAGTAGTTAATGACGCGCCCTG  
ACGGGACTAGAATGAATCAACAACCTCCTGGCGCACCATCGTCGGCTACAGCCTCGGTGACGTGCGCAAT  
AATTTCGCCTTCGCAATGGGGGCGCTCTTCTGTTGAGTTACTACACCGACGTGCTGGCGTGGTGCCGCT  
GCGGCGGGCACCATGCTGTTACTGGTGCGGGTATTCGATGCCTTCGCCGACGTCTTGGCCGACGAGTGGT  
GGACAGTGTGAATATCCGCTGGGGAAAATTCCGCCCGTTTTTACTCTTCGGTACTGCGCCGTTAATGATCAG  
ATCCGAGCTCAAGCTTCTTGATAACTTCGTATAATGTATGCTATACGAAGTTATCCCTTTAGTGAGGGTTAAT  
TAAGCGGCCGCCGGGGCCGCCATTTAAATGCATGCGACTTCCGAAAAACAGCAAAGAAAAGCCAGTAT  
GGAAAAAATAGACAAAAAGTAGGCTAAAAGGCCTACTCTGTTTTAAACTGTTGAATTTATTGAGTTCGAGT  
GAGGTGGAGTACGCGCCCGGGGAGCCCAAGGGCACGCCCTGGCACCCGCACCGCGGATCGATCGAATTCT  
CGACCAATTCTCATGTTTACAGCTTATCATCGAATTTCTGCCATTCATCCGCTTATTATCACTTATTCAGGCG  
TAGCAACCAGGCGTTTAAAGGGCACCAATAACTGCCTTAAAAAATTCGCCCCGCCCTGCCACTCATCGCAG  
TACTGTTGTAATTCATTAAGCATTCTGCCGACATGGAAGCCATCACAAACGGCATGATGAACCTGAATCGCC  
AGCG

**pMEV4::tdFAST2**

cgatgcctgtagcaatggcaacaacgttgcgcaactattaactggcgaactacttactctagcttcccggcaacaattaatagactggatgg  
aggcggataaagttgcaggaccacttctgcgctcggcccttccggctggctggttattgctgataaatctggagccggtgagcgtgggtctcg  
cggtatcattgcagcactggggccagatggtaagccctcccgtatcgtagtattctacacgacggggagtcaggcaactatggatgaacgaa  
atagacagatcgctgagataggtgcctcactgattaagcattggttaactgtcagaccaagttactcatatatactttagattgattaaaactt  
catttttaatttaaaggatctaggtgaagatccttttgataatctcatgacaaaatcccttaactgagttttcgttccactgagcgtcagac  
cccgtagaaaagatcaaaggatccttctgagatcctttttctgcgctaatctgctgcttgcgaacaaaaaaaccaccgctaccagcgggtgg  
ttgtttcgggatcaagagctaccaactcctttccgaaggttaactggcttcagcagagcgcagataccaataactgttcttctagttagcgg  
tagttaggccaccacttcaagaactctgtagcaccgctacatacctcgtctgctaactctgttaccagtggtgctgccagtggcgataagt  
cgtgtcttaccgggttgactcaagacgatagttaccggataaggcgcagcggctcgggctgaacggggggtcgtgcacacagcccagcttg  
gagcgaacgacctacaccgaactgagatacctacagcgtgagctatgagaaagcgccacgcttcccgaaggagaaaaggcggacaggtat  
ccggttaagcggcagggtcggaaacaggagagcgcaggggagcttccaggggaaacgctggtatctttatagtcctgtcgggttcgcca  
cctctgacttgagcgtcgattttgtgatgctcgtcagggggggcggagcctatggaaaaacgccagcaacgcgcccttttacggttctctggcc

tttctgctggccttttgctcacatggtaccattatttagtTTTTTTTatcaccacaacgtataaacccttccagaagaaaacagagaatgaaa  
acagatttaattatataatcgtatctataatttagtTTTTTTTattgcagtttagaagtgctgttctgctggagcgaaatacacgatatcgtgta  
gtctccttcagatgaaaataatTTTTTaatTTTcagaaatattactggaaaaatacctgaaaaatTTTgaaaaaaaacatacaccagcg  
gggaaaaatcgaacattTTTgaaaaagtctattatagggTTTaaacagggccaagacctgcgggatatacccaaaaatgttcgataaaaa  
atcgaacattTTTcgaacattTTTtataatgttcgtatgtgctgagatgttcagataaaaaatcgaacattTTTgaaagacaattgaaagata  
taaaaaaataatctattataatagatatataatgttcgtatgttcgtatTTTTTatatattatattatTTTaaacttgattgattatt  
gaataatTTTattattactTTTTTgatttctgtaaaaaatcgaacatTTTtacatattgtaaaaaataaaaaagatttaaaaaaagtgctcg  
aaaaagttaaacaaacattattataaaatgtagtttaatatgtagtcttgatgctcttcttcttcatgcttaaacttgataactgtagctt  
TTTTcatttcttattTTTgcttcttcttcttcttcttcttctgatacttcaaaaatccaaggtTTTTTaaagttatcga  
gataagaattactagatgaattcgcgcccgggtctagacgagataagaattactagataattcagctgatcgaataataacataaata  
acataggtTaaataaTTTaaaggcatTTTTatataaacaattgtaaaatattggcttatgaaattgTaaatTTTtagctaaagctattgat  
attataatttatagataactaataCTAGTtagggaggtgctATGGAACATGTGGCCTTCGGATCAGAAGATATAGAG  
AACACTTTAGCCAAGATGGATGATGGGCAATTAGACGGATTAGCGTTTGGGGCAATTCAGCTAGATGGGG  
ATGGTAACATTCTCAATACAATGCTGCTGAAGGGGATATAACCGGGCAGATCCAAAACAGGTAATTGGA  
AAGAATTTTTCAAAGACGTCGCACCGGGTACAGATTCACCTGAATTTTATGGTAAATTTAAAGAAGGTGTT  
GCAAGTGAAATCTCAATACGATGTTGAATGGATGATACCTACATCTAGAGGACCTACGAAAGTAAAAAT  
CCACATGAAAAAGCTCTATCAGGTGACAGCTATTGGGTATTTGTTAAAAGAGTAGGAGGCGGGTCAGGA  
GGAGGAGAACACGTCGCTTCGGTAGTGAAGATATAGAAAACACaTTAGCAAAGATGGACGACGGACAGC  
TTGATGGGCTTGCAATTTGGAGCAATCCAATTAGATGGAGATGGTAATATACTTCAATACAATGCAGCAGAA  
GGTGACATCACTGGTAGAGATCCCAAACAGGTCATTGGAAAAATTTTTTAAAGATGTTGCACCAGGAAC  
AGATTCCCAGAATTTTACGAAAAATTTAAAGAAGGAGTAGCATCTGGAATTTGAATACAATGTTTGAAT  
GGATGATTCCAACtCTAGAGGACCAACTAAAGTTAAGATTCACATGAAAAAAGCACTGTCCGGGAGATTCAT  
ATTGGGTTTTTGTAAAGGGTTtaaaattcttcttctttaaacttctccagctcgcagataaaaaacgcccattcgaataatac  
tattcaaaactaaatattcattgaaatattgggtaataattaatctaatatttagatattgagatataataaacattTTTTTaaaa  
atcatctatttcatcttaattttatataataaagccatttttgagtattcaaattcaaattattgtgtattaacatcttatataaacttttcta  
tttaattgtaatagaaaaagtgaatataatatacatagagtaattgtagtataatcaaaaaaactagaggagacgaccttccatgacag  
aatataaaccaacagtttagattagcaacaagagatgacgtacctagggcagtaagaactctgcagcagctttgcagattatccagcaaca  
agacacacagttgatccagatagacacattgaaagagttacagaattacaagaattTTTTTaaacagagttggcttgataggttaaagta  
tggttgagatgatggagcagcagttgagttggacaacaccagaatcagttgaaagctggtgctgttttgcagaaattggaccaagaatg  
gctgaattatcaggatcaagattagcagctcagcaacagatggaaggattacttgaccacacagacaaaagaaccagcatggttttagc  
aacagttggagtttaccagatcaccagggaaaaggttaggttctgctgttgacttctgggtgtgaagcagctgaaagagcaggagttcc  
agcatttttagaaacatcagcaccagaagaatcttcaatttatgaaagacttgatttacagttacagcagatgtgaagttcagaaggacc  
aagaacatggtgatgacaagaaaaccaggagcataaccatggctccgaccgaagccaccggggcgccccgaccgaccgccc  
cccaggcccaccgcgggggacacaccgaacacgcccaccctgctgaacacgcgcgagttcgggtgccaggagcggatcgggaattaa  
ttcgaagctgctggtgaaagagacctatcttacctgctaaaatctaagtaattactaatttattattaattattattagattgggtaaaatag  
taaaagaaaactaaaggaaacctaataatggtttctTTTTTatatattTTTaaattcactggggggatttaaaacttcaTTTTTaaattaaaggga  
tctaggtgaagatccttggtgactctcagtacaatctgctctgatgccgatagttaagccagccccgacaccgccaacaccgctgacgc  
gccctgacgggcttctgctctccggcatccgcttacagacaagctgtgaccgtctccgggagctgcatgtgtcagaggttttaccgtcatca  
ccgaaacgcgagacgaaagggcctcgtgatacgcctattttataggttatgtcatgataataatggttcttagacgtcaggtggcactt  
ttcggggaaatgtgctggaaccctatttgttttttctaaatcattcaaatatgtagcctcatgagacaataaccctgataaatgctt  
aataatattgaaaaaggaagatgagattcaacatttccgtgctgccttattccctTTTTTgcggcattttgccttctgTTTTTgctcacc  
agaaacgctggtgaaagtaaaagatgctgaagatcagttgggtgacagagtggttacatcgaactggtctcaacagcggttaagatcctg  
agagttttcgccccgaagaacgtttccaatgatgagcacttttaaagttctgctatgtggcgcggtattatcccgtattgacgcccgggaaga  
gcaactcggctcggcatacactattctcagaatgacttgggtgagtagtaccaggtcacagaaaagcatcttacggatggcatgacagtaag  
agaattatgagtgctgataacatgagtgataacactgcccgaacttacttctgacaacgatcggaggaccgaaggagctaaccgctt  
TTTTgcacaacatgggggatcatgtaactcgccttgatggtgggaaccggagctgaatgaagccataccaaacgacgagcgtgacacca
